# Supplementary material for: Relative Abundance of Spermadhesin-1 in the Seminal Plasma of Young Nellore Bulls Is in Agreement with Reproductive Parameters
Source: MDPI journal article supplement (doi:10.3390/vetsci10100610), 2023-10-07
Supplement: s1 [file s1]

# **Relative Abundance of Spermadhesin-1 in the Seminal Plasma of Young Nellore Bulls Is in Agreement with Reproductive Parameters**

**Camilo José Ramírez-López 1,2,3,\* , Edvaldo Barros 4 , Pedro Marcus Pereira Vidigal 4 , Denise Silva Okano 1, Juliana Nascimento Duarte Rodrigues 1, Lidiany Lopes Gomes 1, José Carlos Montes-Vergara 2, Victor Gerardo Petro Hernandez 5, Maria Cristina Baracat-Pereira 3 , Simone Eliza Facioni Guimarães 6 and José Domingos Guimarães 1**

1 Laboratory of Animal Reproduction, Department of Veterinary Medicine, Universidade Federal de Viçosa, Viçosa 36570-900, Brazil; deniseokano@gmail.com (D.S.O.); juliana.nascimento@ufv.br (J.N.D.R.); lidianyveterinaria@gmail.com (L.L.G.); jdguima@ufv.br (J.D.G.)

2 Department of Animal Science, Universidad de Córdoba, Montería 230002, Colombia; josemontesv@correo.unicordoba.edu.co

3 Laboratory of Proteomics and Protein Biochemistry, Department of Biochemistry and Molecular Biology, Universidade Federal de Viçosa, Viçosa 36570-900, Brazil; baracat@ufv.br

4 Nucleus for Analysis of Biomolecules, Universidade Federal de Viçosa, Viçosa 36570-900, Brazil; edvaldo.barros@ufv.br (E.B.); pedro.vidigal@ufv.br (P.M.P.V.)

5 Department of Veterinary Medicine, Universidad de Santander, Valledupar 200001, Colombia; vic.petro@mail.udes.edu.co

6 Laboratory of Animal Biotechnology, Department of Animal Science, Universidade Federal de Viçosa, Viçosa 36570-900, Brazil; sfacioni@ufv.br

\* Correspondence: camilo.lopez@ufv.br

**Table S1.** Label-free quantification data of the seminal plasma (SP) proteins of Nellore bulls classified as FIT and UNFIT for reproduction. Only the proteins identified in at least three replicates of each group were considered for quantitative analysis. The abundance of the proteins was estimated by the Exponentially Modified Protein Abundance Index (emPAI).

| UniProtKB.ID | Description                                   | Spectral count |          |          |          |          |          |
|--------------|-----------------------------------------------|----------------|----------|----------|----------|----------|----------|
|              |                                               | FIT.R1         | FIT.R2   | FIT.R3   | UNFIT.R1 | UNFIT.R2 | UNFIT.R3 |
| A0A0A0MP92   | Serpin A3-7                                   | 0.40215        | 0.25027  | 0.16057  | 0.45102  | 0.34691  | 0.14477  |
| A0A0A7NM57   | Preprocathecidin antimicrobial peptide        | 10998.0        | 17612.0  | 0.50121  | 0.83934  | 0.83934  | 0.20377  |
| A0A0E3UT00   | Metalloproteinase inhibitor 2                 | 14067.0        | 13348.0  | 79672.0  | 25853.0  | 57779.0  | 29765.0  |
| A0A0M4B6N2   | Binder of sperm 3                             | 21093.0        | 24637.0  | 24637.0  | 24637.0  | 24637.0  | 15737.0  |
| A0A4W2BP54   | Jacalin-type lectin domain-containing protein | 14072.0        | 15021.0  | 15021.0  | 22812.0  | 18532.0  | 24931.0  |
| A0A4W2DWN4   | Glutathione peroxidase                        | 2472.0         | 29246.0  | 34996.0  | 57814.0  | 49148.0  | 13901.0  |
| A0A6P5C9R4   | protein LEG1 homolog                          | 0.99688        | 0.76962  | 0.76962  | 0.60904  | 0.76962  | 0.54071  |
| A0JN47       | Plexin domain containing 2                    | 0.11329        | 0.12556  | 0.060924 | 0.19413  | 0.060924 | 0.17467  |
| A0JNP2       | Secretoglobin family 1D member                | 12117.0        | 13779.0  | 0.78154  | 13779.0  | 13779.0  | 0.69753  |
| A2I7M9       | Serpin A3-2                                   | 0.51029        | 0.45994  | 0.57471  | 0.45994  | 0.16341  | 0.22894  |
| A2I7N1       | Serpin A3-5                                   | 0.40772        | 0.35161  | 0.45735  | 0.25354  | 0.078234 | 0.22775  |
| A3KMY8       | Beta-glucuronidase                            | 0.29418        | 0.20872  | 0.099419 | 0.15278  | 0.048532 | 0.35102  |
| A4IFC0       | Platelet-derived growth factor D              | 12841.0        | 16968.0  | 16968.0  | 16968.0  | 0.78373  | 16543.0  |
| A4IFR2       | PCSK1N protein                                | 0.41063        | 0.28666  | 0.13431  | 0.0      | 0.0      | 0.12151  |
| A5D7U1       | Placenta-expressed transcript 1 protein       | 0.42242        | 0.4728   | 0.67569  | 1468.0   | 0.90652  | 10233.0  |
| A5D984       | Pyruvate kinase                               | 0.17931        | 0.27423  | 0.27423  | 0.062459 | 0.0      | 0.11623  |
| A5PJL8       | C1QTNF5 protein                               | 13725.0        | 15832.0  | 15832.0  | 15832.0  | 12557.0  | 13725.0  |
| A5PKI3       | Protein FAM3C                                 | 0.28683        | 0.51509  | 0.31914  | 42693.0  | 59509.0  | 48431.0  |
| A6BMK7       | Sialidase-1                                   | 0.32244        | 0.25965  | 0.079982 | 0.25965  | 0.16636  | 0.2332   |
| A6QLR7       | ARSG protein                                  | 0.057863       | 0.063947 | 0.0      | 0.0      | 0.0      | 0.0      |
| A6QLS9       | RAB10 protein                                 | 0.14801        | 0.35398  | 0.0      | 0.35398  | 0.35398  | 0.31793  |
| A6QLZ3       | ARSB protein                                  | 0.23992        | 0.061039 | 0.061039 | 0.1258   | 0.0      | 0.11352  |
| A6QM01       | N-acetyl-alpha-glucosaminidase                | 0.53988        | 0.68811  | 0.099881 | 0.26872  | 0.048752 | 0.18849  |
| A6QNJ8       | GANAB protein                                 | 0.96805        | 0.7943   | 0.29671  | 0.52535  | 0.17632  | 0.4662   |
| A6QNL5       | Protein disulfide-isomerase A6                | 0.2118         | 0.073087 | 0.15152  | 0.073087 | 0.15152  | 0.066132 |
| A6QNX2       | DPP7 protein                                  | 0.42769        | 0.29892  | 0.29892  | 0.48039  | 0.21671  | 0.26791  |
| A6QP36       | LMAN2 protein                                 | 0.081467       | 0.090039 | 0.0      | 0.18819  | 0.090039 | 0.16957  |
| A6QP39       | MSLN protein                                  | 11978.0        | 22622.0  | 10329.0  | 10329.0  | 1.38     | 13609.0  |
| A6QPK0       | SCGB2A2 protein                               | 63679.0        | 54643.0  | 15425.0  | 78229.0  | 78229.0  | 21306.0  |

|        |                                                 |          |          |          |          |          |          |
|--------|-------------------------------------------------|----------|----------|----------|----------|----------|----------|
| A6QPT4 | MPO protein                                     | 0.42196  | 0.18833  | 0.044082 | 0.0      | 0.0      | 0.03989  |
| A6QPZ4 | SERPINB4 protein                                | 12668.0  | 19472.0  | 12494.0  | 0.56888  | 10556.0  | 0.50559  |
| A6QQA8 | Sulfhydryl oxidase                              | 82976.0  | 73527.0  | 56802.0  | 94439.0  | 83399.0  | 51988.0  |
| A7E3W2 | Galectin-3-binding protein                      | 12756.0  | 1772.0   | 13388.0  | 14751.0  | 0.97333  | 1795.0   |
| A7MB70 | Semaphorin-3C                                   | 0.57022  | 0.33683  | 0.18044  | 0.45243  | 0.28252  | 0.3011   |
| A7MBJ5 | Cullin-associated NEDD8-dissociated protein 1   | 0.098906 | 0.053423 | 0.053423 | 0.0      | 0.0      | 0.073298 |
| A8DC37 | Fc fragment of IgG receptor IIa                 | 0.22251  | 0.3929   | 0.24723  | 0.1168   | 0.1168   | 0.10567  |
| B0JYQ0 | ALB protein                                     | 31759.0  | 49246.0  | 35949.0  | 49246.0  | 35949.0  | 31759.0  |
| B5T255 | Peptidoglycan recognition protein 1             | 27576.0  | 16337.0  | 2637.0   | 59362.0  | 3274.0   | 1.8      |
| B9TUD2 | Cathelicidin 7                                  | 0.63362  | 0.71279  | 0.0      | 0.0      | 0.71279  | 0.0      |
| D4QBC5 | Hemoglobin beta                                 | 89607.0  | 9047.0   | 9047.0   | 43549.0  | 56046.0  | 46068.0  |
| D4QBD1 | Hemoglobin beta                                 | 46068.0  | 71459.0  | 9047.0   | 17.85    | 22249.0  | 16695.0  |
| E1B6Z6 | Lipocalin 2                                     | 23845.0  | 11035.0  | 0.81285  | 14409.0  | 11035.0  | 12542.0  |
| E1B748 | Hypoxia up-regulated 1                          | 0.8819   | 0.76968  | 0.88556  | 0.8267   | 0.55886  | 0.53895  |
| E1B818 | Olfactomedin like 2A                            | 0.35526  | 0.27051  | 0.27051  | 0.33283  | 0.15448  | 0.24252  |
| E1B8A0 | Tartrate-resistant acid phosphatase type 5      | 0.39776  | 0.20234  | 0.096511 | 0.31838  | 0.096511 | 0.0      |
| E1B9P4 | Epididymal sperm binding protein 1              | 0.0      | 0.0      | 0.0      | 0.30274  | 0.30274  | 0.0      |
| E1BBK6 | Nephronectin                                    | 0.34223  | 0.54126  | 0.17613  | 0.54126  | 0.24148  | 0.2168   |
| E1BBU4 | ADAM metalloproteinase domain 15                | 0.071234 | 0.078859 | 0.038682 | 0.038682 | 0.038682 | 0.035004 |
| E1BDF3 | Matrilin 4                                      | 34336.0  | 23328.0  | 19873.0  | 21553.0  | 16776.0  | 24591.0  |
| E1BDR2 | Alpha-L-iduronidase                             | 0.14348  | 0.21787  | 0.10357  | 0.27939  | 0.0      | 0.19575  |
| E1BDY3 | Golgi apparatus protein 1                       | 0.10027  | 0.1409   | 0.082302 | 0.11121  | 0.026714 | 0.10027  |
| E1BG25 | Melanotransferrin                               | 0.37325  | 0.35807  | 0.41877  | 0.35807  | 0.091384 | 0.21925  |
| E1BH06 | Complement component 4A                         | 0.4204   | 0.44626  | 0.27105  | 0.13785  | 0.096635 | 0.18189  |
| E1BHP0 | Alpha-mannosidase                               | 0.35902  | 0.36032  | 0.20277  | 0.16633  | 0.0      | 0.087262 |
| E1BI28 | GM2 ganglioside activator                       | 0.34605  | 0.91961  | 0.17707  | 0.0      | 16596.0  | 0.56168  |
| E1BI74 | NAD                                             | 0.9265   | 0.85567  | 10571.0  | 15279.0  | 10571.0  | 18022.0  |
| E1BKX1 | Hyaluronoglucosaminidase                        | 0.043046 | 0.097504 | 0.047618 | 0.023532 | 0.0      | 0.0      |
| E1BKZ9 | Sortilin 1                                      | 0.072294 | 0.12242  | 0.039247 | 0.039247 | 0.039247 | 0.11038  |
| E1BLI4 | CUB domain-containing protein                   | 22817.0  | 46661.0  | 46661.0  | 46661.0  | 35617.0  | 30006.0  |
| E1BMJ0 | Serpin family G member 1                        | 0.96635  | 0.60649  | 0.50129  | 0.96838  | 0.22527  | 0.6352   |
| E1BN79 | Carboxylic ester hydrolase                      | 13254.0  | 14001.0  | 12723.0  | 15351.0  | 0.72838  | 0.81428  |
| E1BNJ9 | Serine protease 22                              | 0.31976  | 0.22566  | 0.35692  | 0.35692  | 0.50224  | 0.096895 |
| E1BQ21 | FAM3 metabolism regulating signaling molecule B | 10589.0  | 0.48692  | 0.69714  | 15235.0  | 22875.0  | 16193.0  |
| F1MCF5 | Glutathione peroxidase                          | 9432.0   | 15137.0  | 74937.0  | 12029.0  | 95197.0  | 60573.0  |
| F1MD95 | Calsynenin 1                                    | 0.030628 | 0.068834 | 0.033844 | 0.033844 | 0.033844 | 0.094726 |

|        |                                                           |          |          |          |          |          |          |
|--------|-----------------------------------------------------------|----------|----------|----------|----------|----------|----------|
| F1MDF2 | Beta-microseminoprotein                                   | 0.63102  | 19116.0  | 19116.0  | 1229.0   | 19116.0  | 16602.0  |
| F1MGN0 | Semaphorin 3F                                             | 0.15478  | 0.21947  | 0.12642  | 0.26883  | 0.0826   | 0.074606 |
| F1MGQ1 | Deoxyribonuclease                                         | 62293.0  | 10.86    | 43749.0  | 13455.0  | 22704.0  | 15238.0  |
| F1MGU7 | Fibrinogen gamma-B chain                                  | 0.3726   | 0.62975  | 0.41748  | 0.14976  | 0.14976  | 0.20928  |
| F1MHF1 | ST6 beta-galactoside alpha-2,6-sialyltransferase 1        | 11257.0  | 11276.0  | 0.97291  | 11276.0  | 12945.0  | 17964.0  |
| F1MHR8 | MATN2 protein                                             | 0.061929 | 0.033703 | 0.033703 | 0.068541 | 0.0      | 0.094317 |
| F1MHS5 | Protein S100-A9                                           | 0.20665  | 0.50902  | 0.85372  | 0.0      | 0.0      | 0.20665  |
| F1MLR4 | Ciliary neurotrophic factor receptor                      | 0.081014 | 0.089539 | 0.1871   | 0.29339  | 0.1871   | 0.16859  |
| F1MLW2 | BPI fold-containing family B member 1                     | 28665.0  | 48168.0  | 21622.0  | 26208.0  | 26208.0  | 42578.0  |
| F1MLW8 | Immunoglobulin lambda-like polypeptide 5                  | 0.46216  | 0.51781  | 0.32072  | 0.32072  | 0.74431  | 0.28824  |
| F1MNJ4 | APC down-regulated 1                                      | 0.25619  | 0.28573  | 0.20743  | 0.28573  | 0.1339   | 0.1208   |
| F1MS23 | Lipocln_cytosolic_FA-bd_dom domain-containing protein     | 0.37003  | 0.4124   | 0.4124   | 0.99486  | 29795.0  | 0.60359  |
| F1MTI7 | Protein CutA                                              | 0.45251  | 0.84647  | 0.84647  | 0.50509  | 12653.0  | 0.75057  |
| F1MU34 | Aminopeptidase                                            | 0.094114 | 0.068396 | 0.033632 | 0.033632 | 0.0      | 0.12741  |
| F1MUB9 | Serine protease 8                                         | 0.29509  | 0.20888  | 0.20888  | 0.32915  | 0.20888  | 0.29509  |
| F1MUF4 | Beta-galactosidase                                        | 0.68525  | 12597.0  | 0.69471  | 0.8653   | 0.61536  | 0.68525  |
| F1MWD3 | T-complex protein 1 subunit epsilon                       | 0.11286  | 0.26579  | 0.060694 | 0.060694 | 0.0      | 0.05492  |
| F1MWI1 | Clusterin                                                 | 12697.0  | 19053.0  | 12714.0  | 10925.0  | 0.9277   | 0.95547  |
| F1MWT0 | Alpha-mannosidase                                         | 0.31954  | 0.20151  | 0.1653   | 0.063104 | 0.0      | 0.057024 |
| F1MX50 | Cellular repressor of E1A stimulateds 1                   | 0.4771   | 0.77032  | 0.33053  | 1042.0   | 1042.0   | 0.9158   |
| F1MY12 | NTR domain-containing protein                             | 0.46704  | 0.52334  | 0.52334  | 0.32393  | 0.52334  | 0.46704  |
| F1MYX5 | Lymphocyte cytosolic protein 1                            | 0.37605  | 0.49513  | 0.051562 | 0.1628   | 0.0      | 0.31471  |
| F1MZ40 | Growth arrest specific 6                                  | 0.40892  | 0.32778  | 0.15229  | 0.099113 | 0.048386 | 0.0      |
| F1MZJ5 | ADAM metallopeptidase domain 9                            | 0.0      | 0.12776  | 0.0      | 0.0      | 0.0      | 0.075377 |
| F1N0F2 | Sialic acid acetyltransferase                             | 0.37741  | 0.42318  | 0.12483  | 0.19297  | 0.19297  | 0.30583  |
| F1N152 | Serine protease HTRA1                                     | 0.63351  | 0.50001  | 0.40199  | 0.50001  | 0.22475  | 0.73685  |
| F1N303 | ADAM metallopeptidase with thrombospondin type 1 motif 19 | 0.049266 | 0.0      | 0.026892 | 0.0      | 0.0      | 0.074802 |
| F1N3U5 | Vanin 2                                                   | 14763.0  | 19026.0  | 21025.0  | 42858.0  | 36266.0  | 21537.0  |
| F1N554 | Polypeptide N-acetylgalactosaminyltransferase             | 0.051614 | 0.11733  | 0.05704  | 0.11733  | 0.05704  | 0.10589  |
| F1N5H2 | Alpha-L-fucosidase                                        | 0.26791  | 0.21671  | 0.067569 | 0.21671  | 0.29892  | 0.19486  |
| F1N5W4 | Ectonucleotide pyrophosphatase                            | 0.2556   | 0.18183  | 0.0      | 0.087118 | 0.087118 | 0.078825 |
| F1N7D7 | Dystroglycan 1                                            | 0.4371   | 0.43859  | 0.24383  | 0.43859  | 0.33767  | 0.3454   |
| F1N7F3 | Receptor protein-tyrosine kinase                          | 0.024729 | 0.027326 | 0.027326 | 0.027326 | 0.0      | 0.0      |
| G1CW25 | Lactotransferrin                                          | 37363.0  | 45569.0  | 38532.0  | 32387.0  | 18237.0  | 2705.0   |
| G3MWX7 | Lipocln_cytosolic_FA-bd_dom domain-containing protein     | 15185.0  | 11027.0  | 14855.0  | 26555.0  | 14855.0  | 15185.0  |
| G3MX66 | Vitelline membrane outer layer 1 homolog                  | 13958.0  | 0.89492  | 12233.0  | 0.89492  | 0.61508  | 0.33808  |

|        |                                                       |          |          |          |          |          |          |
|--------|-------------------------------------------------------|----------|----------|----------|----------|----------|----------|
| G3MZ03 | Alpha 1,4-galactosyltransferase                       | 0.35565  | 0.087354 | 0.18234  | 0.52004  | 0.087354 | 0.25635  |
| G3N0V0 | Immunoglobulin heavy constant mu                      | 18662.0  | 18924.0  | 13845.0  | 16262.0  | 13845.0  | 14049.0  |
| G3N2D8 | Glutathione hydrolase                                 | 0.0      | 0.12246  | 0.059462 | 0.059462 | 0.1892   | 0.11051  |
| G3X6G7 | Meteorin-like protein                                 | 0.097543 | 0.22724  | 0.10781  | 0.10781  | 0.0      | 0.097543 |
| G5E589 | Proteasome subunit beta                               | 0.42856  | 0.47976  | 0.13954  | 0.13954  | 0.47976  | 0.60891  |
| G5E5M8 | Alpha-mannosidase                                     | 0.18214  | 0.16633  | 0.13098  | 0.03125  | 0.03125  | 0.05736  |
| G5E5T5 | Immunoglobulin heavy constant mu                      | 0.25122  | 0.50871  | 0.1788   | 0.27986  | 0.50871  | 0.34827  |
| G5E604 | Ig-like domain-containing protein                     | 40373.0  | 33495.0  | 22415.0  | 33495.0  | 33495.0  | 28474.0  |
| H7BWW2 | Beta-hexosaminidase                                   | 11826.0  | 0.99012  | 1232.0   | 0.58217  | 0.8792   | 0.96685  |
| L8HKR7 | Ig gamma-3 chain C region                             | 0.76386  | 0.68236  | 10715.0  | 0.86682  | 12986.0  | 0.45985  |
| L8HP94 | Ig alpha-1 chain C region                             | 0.82498  | 13423.0  | 13423.0  | 11309.0  | 0.7637   | 13617.0  |
| L8HPF5 | Ig gamma-1 chain C region                             | 13096.0  | 90735.0  | 12446.0  | 46544.0  | 13779.0  | 38916.0  |
| L8HZ66 | Phosphoglycerate kinase                               | 1896.0   | 15517.0  | 0.7271   | 10189.0  | 0.7271   | 0.64251  |
| L8HZP9 | Angiotensin-converting enzyme                         | 0.43909  | 0.42124  | 0.386    | 0.35163  | 0.25356  | 0.19962  |
| L8I064 | Iduronate 2-sulfatase                                 | 0.24597  | 0.27423  | 0.0      | 0.12882  | 0.062459 | 0.11623  |
| L8I2G8 | SERPIN domain-containing protein                      | 0.0      | 0.0      | 0.0      | 0.0      | 0.10745  | 0.097218 |
| L8IAF4 | Ig lambda-1 chain C regions                           | 12278.0  | 22072.0  | 0.33823  | 47437.0  | 92862.0  | 54822.0  |
| L8IAH9 | Sulfhydryl oxidase                                    | 61842.0  | 49755.0  | 41692.0  | 59075.0  | 55817.0  | 38429.0  |
| L8IC40 | Protein FAM3D                                         | 0.9158   | 0.77032  | 0.53475  | 0.77032  | 13555.0  | 14848.0  |
| L8ICQ2 | 5'-nucleotidase                                       | 33925.0  | 22583.0  | 24468.0  | 38304.0  | 41099.0  | 25815.0  |
| L8IEA1 | Beta-N-acetylhexosaminidase                           | 15194.0  | 0.84186  | 0.84186  | 0.72101  | 0.72101  | 0.6369   |
| L8IHR1 | Protocadherin Fat 2                                   | 0.013572 | 0.015001 | 0.022586 | 0.0      | 0.0      | 0.0      |
| L8IQM7 | Vitamin K-dependent protein S                         | 0.29078  | 0.26433  | 0.45537  | 0.048025 | 0.0      | 0.13612  |
| L8IVU7 | T-complex protein 1 subunit delta                     | 0.54481  | 0.27079  | 0.34925  | 0.19689  | 0.0      | 0.31234  |
| L8IXW5 | Proactivator polypeptide                              | 0.9154   | 0.7112   | 0.92817  | 0.92817  | 10468.0  | 0.81442  |
| L8J2B5 | Amyloid-like protein 2                                | 0.076665 | 0.041578 | 0.041578 | 0.041578 | 0.084884 | 0.037625 |
| L8J3B9 | Slit-like protein 3 protein                           | 0.33724  | 0.28664  | 0.31646  | 0.071154 | 0.0      | 0.0      |
| L8J3G6 | Annexin                                               | 0.76486  | 10433.0  | 0.86873  | 0.42945  | 0.86873  | 0.91406  |
| O46375 | Transthyretin                                         | 11737.0  | 0.23679  | 0.52965  | 0.52965  | 0.89186  | 0.21422  |
| O77588 | Procollagen-lysine,2-oxoglutarate 5-dioxygenase 1     | 0.84687  | 0.73281  | 0.73281  | 0.96719  | 0.40257  | 0.41212  |
| P00517 | cAMP-dependent protein kinase catalytic subunit alpha | 0.08405  | 0.092895 | 0.092895 | 0.092895 | 0.092895 | 0.17516  |
| P00570 | Adenylate kinase isoenzyme 1                          | 1049.0   | 0.87724  | 0.87724  | 0.87724  | 1572.0   | 0.77513  |
| P00669 | Seminal ribonuclease                                  | 0.20665  | 32212.0  | 24363.0  | 10808.0  | 16819.0  | 4423.0   |
| P01045 | Kininogen-2                                           | 0.097406 | 0.0      | 0.10791  | 0.10791  | 0.0      | 0.14961  |
| P01888 | Beta-2-microglobulin                                  | 4.36     | 74662.0  | 35987.0  | 74662.0  | 52397.0  | 20627.0  |
| P01966 | Hemoglobin subunit alpha                              | 23359.0  | 14087.0  | 14087.0  | 80044.0  | 36571.0  | 30777.0  |

|        |                                                       |         |          |          |          |          |          |
|--------|-------------------------------------------------------|---------|----------|----------|----------|----------|----------|
| P02584 | Profilin-1                                            | 0.49836 | 0.55669  | 0.94225  | 0.0      | 0.94225  | 0.49836  |
| P02672 | Fibrinogen alpha chain                                | 0.94971 | 0.60508  | 0.37087  | 0.60508  | 0.69172  | 0.26929  |
| P02676 | Fibrinogen beta chain                                 | 0.57106 | 0.28262  | 0.28262  | 0.20524  | 0.28262  | 0.1846   |
| P02769 | Albumin                                               | 37953.0 | 43519.0  | 35949.0  | 55586.0  | 43519.0  | 33729.0  |
| P02784 | Seminal plasma protein PDC-109                        | 22817.0 | 19809.0  | 38878.0  | 93923.0  | 116.9    | 18.51    |
| P04557 | Seminal plasma protein A3                             | 15896.0 | 55244.0  | 33006.0  | 42971.0  | 55244.0  | 45441.0  |
| P05307 | Protein disulfide-isomerase                           | 0.32124 | 0.44538  | 0.20224  | 0.20224  | 0.063319 | 0.18192  |
| P07456 | Insulin-like growth factor II                         | 0.17048 | 0.18844  | 0.0      | 0.0      | 0.0      | 0.0      |
| P07688 | Cathepsin B                                           | 0.9928  | 15818.0  | 15818.0  | 15818.0  | 13481.0  | 18132.0  |
| P08037 | Beta-1,4-galactosyltransferase 1                      | 0.0     | 0.0      | 0.081191 | 0.0      | 0.0      | 0.15232  |
| P0C0S9 | Histone H2A type 1                                    | 0.2387  | 0.59729  | 0.59729  | 0.26384  | 0.0      | 0.0      |
| P10096 | Glyceraldehyde-3-phosphate dehydrogenase              | 0.19247 | 0.21372  | 0.0      | 0.10169  | 0.21372  | 0.19247  |
| P10152 | Angiogenin-1                                          | 0.67684 | 11284.0  | 27505.0  | 44716.0  | 44716.0  | 0.67684  |
| P12763 | Alpha-2-HS-glycoprotein                               | 0.38985 | 0.31224  | 0.0      | 0.1986   | 0.0      | 0.0      |
| P13600 | Beta-nerve growth factor                              | 30936.0 | 31355.0  | 37052.0  | 26348.0  | 59299.0  | 22366.0  |
| P13696 | Phosphatidylethanolamine-binding protein 1            | 0.34402 | 0.38322  | 0.0      | 0.0      | 0.62682  | 0.0      |
| P14769 | N-acetyllactosaminide alpha-1,3-galactosyltransferase | 0.1581  | 0.08416  | 0.08416  | 0.27433  | 0.08416  | 0.076149 |
| P15497 | Apolipoprotein A-I                                    | 10661.0 | 14889.0  | 0.40769  | 0.25604  | 0.57764  | 0.23039  |
| P16116 | Aldo-keto reductase family 1 member B1                | 0.55282 | 0.47311  | 0.33714  | 0.62291  | 0.33714  | 0.55282  |
| P17697 | Clusterin                                             | 12665.0 | 13511.0  | 13511.0  | 7978.0   | 58239.0  | 54738.0  |
| P19120 | Heat shock cognate 71 kDa protein                     | 0.3693  | 0.34584  | 0.28084  | 0.34584  | 0.34584  | 0.30918  |
| P19879 | Mimecan                                               | 17569.0 | 12509.0  | 0.66046  | 0.66046  | 10338.0  | 0.90662  |
| P22226 | Cathelicidin-1                                        | 47182.0 | 3612.0   | 15997.0  | 21472.0  | 21472.0  | 0.68724  |
| P25326 | Cathepsin S                                           | 11107.0 | 1493.0   | 0.72996  | 10767.0  | 10767.0  | 0.64545  |
| P28291 | C-C motif chemokine 2                                 | 28474.0 | 48361.0  | 22415.0  | 95075.0  | 68309.0  | 28474.0  |
| P29392 | Spermadhesin-1                                        | 365.61  | 408.91   | 511.22   | 261.52   | 261.52   | 198.04   |
| P31096 | Osteopontin                                           | 31619.0 | 43656.0  | 24281.0  | 24281.0  | 20649.0  | 17692.0  |
| P31976 | Ezrin                                                 | 0.26253 | 0.16672  | 0.22826  | 0.16672  | 0.10827  | 0.20502  |
| P34955 | Alpha-1-antiproteinase                                | 0.85877 | 0.83465  | 0.5764   | 0.35449  | 0.5764   | 0.85877  |
| P37141 | Glutathione peroxidase 3                              | 32883.0 | 30372.0  | 30372.0  | 79621.0  | 39279.0  | 41442.0  |
| P38657 | Protein disulfide-isomerase A3                        | 0.25071 | 0.53943  | 0.20309  | 0.36091  | 0.44742  | 0.65425  |
| P40682 | V-type proton ATPase subunit S1                       | 0.53771 | 0.8395   | 0.22527  | 0.60649  | 0.71905  | 0.44603  |
| P45478 | Palmitoyl-protein thioesterase 1                      | 0.23315 | 0.77896  | 0.41286  | 0.25912  | 0.1221   | 0.23315  |
| P52193 | Calreticulin                                          | 0.21921 | 0.075485 | 0.075485 | 0.075485 | 0.0      | 0.0683   |
| P55206 | C-type natriuretic peptide                            | 36269.0 | 43252.0  | 43252.0  | 43252.0  | 43252.0  | 36269.0  |
| P62803 | Histone H4                                            | 11806.0 | 31299.0  | 2.11     | 0.76351  | 2.11     | 0.29676  |

|        |                                                 |          |          |          |          |          |          |
|--------|-------------------------------------------------|----------|----------|----------|----------|----------|----------|
| P62935 | Peptidyl-prolyl cis-trans isomerase A           | 0.41144  | 0.4589   | 0.4589   | 0.20785  | 0.4589   | 0.0      |
| P62992 | Ubiquitin-40S ribosomal protein S27a            | 0.18684  | 0.75632  | 0.75632  | 1119.0   | 0.45569  | 0.67175  |
| P63103 | 14-3-3 protein zeta/delta                       | 0.57084  | 0.451    | 0.64269  | 0.0      | 0.28167  | 0.11952  |
| P63258 | Actin, cytoplasmic 2                            | 51776.0  | 31372.0  | 25007.0  | 17247.0  | 15064.0  | 14855.0  |
| P68103 | Elongation factor 1-alpha 1                     | 0.20928  | 0.14976  | 0.072267 | 0.0      | 0.072267 | 0.13506  |
| P79345 | NPC intracellular cholesterol transporter 2     | 5242.0   | 80853.0  | 19269.0  | 19269.0  | 29274.0  | 11985.0  |
| P80025 | Lactoperoxidase                                 | 0.082523 | 0.044693 | 0.091384 | 0.091384 | 0.14016  | 0.040444 |
| P80311 | Peptidyl-prolyl cis-trans isomerase B           | 71594.0  | 16838.0  | 12373.0  | 16838.0  | 30741.0  | 83033.0  |
| P81019 | Seminal plasma protein BSP-30 kDa               | 67593.0  | 14334.0  | 12059.0  | 46.19    | 39189.0  | 12933.0  |
| P81134 | Renin receptor                                  | 18388.0  | 24446.0  | 16426.0  | 0.85595  | 12146.0  | 0.61859  |
| P81187 | Complement factor B                             | 1858.0   | 21842.0  | 24589.0  | 12871.0  | 0.93834  | 11172.0  |
| P81265 | Polymeric immunoglobulin receptor               | 0.364    | 0.34926  | 0.1867   | 0.9001   | 0.53409  | 0.72157  |
| P81425 | Dipeptidyl peptidase 4                          | 0.03691  | 0.040788 | 0.08324  | 0.22127  | 0.12742  | 0.15602  |
| P81947 | Tubulin alpha-1B chain                          | 0.28694  | 0.071945 | 0.071945 | 0.0      | 0.0      | 0.065098 |
| P82292 | Spermadhesin Z13                                | 87206.0  | 63076.0  | 83702.0  | 86801.0  | 52402.0  | 11203.0  |
| Q08DW4 | Mannan-binding lectin serine peptidase 1        | 0.21762  | 0.044385 | 0.044385 | 0.090741 | 0.044385 | 0.040165 |
| Q08E54 | Amyloid-beta A4 protein                         | 0.21633  | 0.13836  | 0.044142 | 0.13836  | 0.044142 | 0.21633  |
| Q0IIH5 | Nucleobindin 2                                  | 0.47348  | 0.64566  | 0.0      | 0.53262  | 0.3293   | 0.57182  |
| Q0P569 | Nucleobindin-1                                  | 75278.0  | 42569.0  | 36269.0  | 33408.0  | 36269.0  | 32554.0  |
| Q0V8B6 | Tripeptidyl-peptidase 1                         | 0.68259  | 0.77446  | 0.67556  | 0.58217  | 0.33209  | 0.59728  |
| Q0V8R6 | Beta-hexosaminidase subunit alpha               | 0.29775  | 0.49506  | 0.33277  | 0.33277  | 0.33277  | 0.36719  |
| Q0VCQ9 | Reticulocalbin 2                                | 0.089464 | 0.32694  | 0.32694  | 0.09888  | 0.09888  | 0.089464 |
| Q0VCX2 | Endoplasmic reticulum chaperone BiP             | 21517.0  | 25455.0  | 16475.0  | 25455.0  | 12877.0  | 21517.0  |
| Q0VD19 | Sphingomyelin phosphodiesterase                 | 0.24744  | 0.21533  | 0.21533  | 0.1575   | 0.10242  | 0.14186  |
| Q148N3 | Matrix metalloproteinase 7                      | 0.23597  | 0.41817  | 0.41817  | 0.12351  | 0.26227  | 0.23597  |
| Q17QB3 | Acid ceramidase                                 | 0.70678  | 0.67401  | 0.67401  | 0.67401  | 0.93949  | 0.49326  |
| Q17QC7 | Nectin cell adhesion molecule 2                 | 0.49407  | 0.46114  | 0.20877  | 0.37165  | 0.20877  | 0.33214  |
| Q17QK3 | Carboxypeptidase Q                              | 0.17837  | 0.198    | 0.198    | 0.0      | 0.09453  | 0.17837  |
| Q17QR9 | SPARC                                           | 0.25266  | 0.1798   | 0.28148  | 0.086186 | 0.0      | 0.16204  |
| Q1JPB0 | Leukocyte elastase inhibitor                    | 0.96563  | 0.93747  | 0.51189  | 0.1798   | 0.1798   | 0.16204  |
| Q1LZH9 | N-acetylglucosamine-6-sulfatase                 | 0.66285  | 0.6561   | 0.56583  | 0.48048  | 0.11863  | 0.28951  |
| Q1RMN0 | Aspartylglucosaminidase                         | 0.29118  | 0.32476  | 0.32476  | 0.75498  | 0.59794  | 0.29118  |
| Q1RMN8 | Immunoglobulin light chain, lambda gene cluster | 0.66323  | 13121.0  | 0.74852  | 0.74852  | 10107.0  | 0.66323  |
| Q1ZYR0 | Ceroid-lipofuscinosis neuronal protein 5        | 0.25861  | 0.28816  | 0.088071 | 0.088071 | 0.088071 | 0.079686 |
| Q28017 | Platelet-activating factor acetylhydrolase      | 76158.0  | 76975.0  | 90001.0  | 11329.0  | 55794.0  | 41907.0  |
| Q28085 | Complement factor H                             | 0.98843  | 0.88169  | 12461.0  | 19664.0  | 0.92988  | 0.85635  |

|        |                                              |          |          |          |          |          |          |
|--------|----------------------------------------------|----------|----------|----------|----------|----------|----------|
| Q29443 | Serotransferrin                              | 15771.0  | 15938.0  | 17143.0  | 19722.0  | 14787.0  | 14732.0  |
| Q29444 | Beta-mannosidase                             | 15108.0  | 19614.0  | 16661.0  | 14002.0  | 10146.0  | 14324.0  |
| Q29451 | Lysosomal alpha-mannosidase                  | 0.12045  | 0.1337   | 0.098685 | 0.064753 | 0.031869 | 0.02884  |
| Q2HJF0 | Serotransferrin-like                         | 16374.0  | 17683.0  | 10396.0  | 12583.0  | 10396.0  | 0.90889  |
| Q2KHZ8 | Lysosomal acid glucosylceramidase            | 0.054714 | 0.2647   | 0.12459  | 0.060466 | 0.0      | 0.11242  |
| Q2KIF2 | Leucine-rich alpha-2-glycoprotein 1          | 0.38985  | 0.1986   | 0.0      | 0.0      | 0.0      | 0.0      |
| Q2KIM0 | Tissue alpha-L-fucosidase                    | 0.26251  | 0.21244  | 0.29284  | 0.13703  | 0.0      | 0.33827  |
| Q2KIY5 | Putative phospholipase B-like 2              | 0.21441  | 0.2388   | 0.11301  | 0.11301  | 0.11301  | 0.15684  |
| Q2KJF1 | Alpha-1B-glycoprotein                        | 0.60916  | 0.80336  | 0.48157  | 0.58189  | 0.38761  | 0.42873  |
| Q2LGB2 | MD-2 protein                                 | 0.38455  | 0.4287   | 0.4287   | 0.19528  | 0.19528  | 0.91697  |
| Q2NKZ9 | Carboxypeptidase                             | 0.20632  | 0.31722  | 0.071308 | 0.071308 | 0.0      | 0.0      |
| Q2NL29 | Inositol-3-phosphate synthase 1              | 0.053905 | 0.18957  | 0.059572 | 0.0      | 0.0      | 0.053905 |
| Q2T9S4 | Glycerol-3-phosphate phosphatase             | 0.44426  | 0.10639  | 0.10639  | 0.0      | 0.22409  | 0.096255 |
| Q2TBU0 | Haptoglobin                                  | 0.64054  | 0.72482  | 0.86451  | 0.72482  | 0.47606  | 0.32693  |
| Q2TBX4 | Heat shock 70 kDa protein 13                 | 15096.0  | 15757.0  | 0.60489  | 14074.0  | 1.25     | 0.96355  |
| Q2UVX4 | Complement C3                                | 2572.0   | 33994.0  | 30776.0  | 22465.0  | 13064.0  | 13637.0  |
| Q32KV0 | Phosphoglycerate mutase 2                    | 0.54966  | 13224.0  | 0.43493  | 0.43493  | 0.2722   | 0.54966  |
| Q32L40 | T-complex protein 1 subunit alpha            | 0.23605  | 0.12387  | 0.0      | 0.0      | 0.0      | 0.054408 |
| Q32L48 | Histone H2B type 1-N                         | 0.54925  | 0.61406  | 0.61406  | 0.61406  | 10506.0  | 0.54925  |
| Q32LF7 | Beta-1,4-galactosyltransferase               | 92525.0  | 7333.0   | 66284.0  | 48524.0  | 7333.0   | 58636.0  |
| Q32LQ0 | Glutamyl aminopeptidase                      | 0.0      | 0.032777 | 0.0      | 0.2135   | 0.032777 | 0.22705  |
| Q3B7N2 | Alpha-actinin-1                              | 0.098125 | 0.10879  | 0.035022 | 0.0      | 0.0      | 0.064391 |
| Q3MHM5 | Tubulin beta-4B chain                        | 0.37545  | 0.42071  | 0.23454  | 0.15081  | 0.072757 | 0.136    |
| Q3MHN5 | Vitamin D-binding protein                    | 0.12684  | 0.14062  | 0.067997 | 0.0      | 0.0      | 0.0      |
| Q3MHX6 | Protein OS-9                                 | 0.13486  | 0.20443  | 0.1497   | 0.26176  | 0.097465 | 0.13486  |
| Q3MI05 | Lysosomal protective protein                 | 0.60298  | 0.38395  | 0.21527  | 0.47687  | 0.1388   | 0.26609  |
| Q3SX14 | Gelsolin                                     | 0.42879  | 0.48217  | 0.29997  | 0.84435  | 0.29997  | 0.37325  |
| Q3SX46 | C1GALT1-specific chaperone 1                 | 0.090576 | 0.21024  | 0.10011  | 0.10011  | 0.10011  | 0.29708  |
| Q3SYR8 | Immunoglobulin J chain                       | 0.99215  | 11284.0  | 0.76213  | 0.76213  | 11284.0  | 0.41144  |
| Q3SYW2 | Complement C2                                | 0.21318  | 0.13641  | 0.13641  | 0.088987 | 0.088987 | 0.080363 |
| Q3SZB7 | Fructose-1,6-bisphosphatase 1                | 0.41023  | 0.60455  | 0.32804  | 0.20821  | 0.099185 | 0.2941   |
| Q3SZV7 | Hemopexin                                    | 0.20066  | 0.2232   | 0.2232   | 0.30817  | 0.2232   | 0.20066  |
| Q3T010 | Phosphatidylethanolamine-binding protein 4   | 0.4527   | 0.3145   | 0.14652  | 0.7279   | 0.50709  | 0.64526  |
| Q3T052 | Inter-alpha-trypsin inhibitor heavy chain H4 | 0.099463 | 0.07223  | 0.035485 | 0.11028  | 0.0      | 0.032112 |
| Q3T0A3 | Complement factor D                          | 0.40685  | 0.28415  | 0.64903  | 0.4552   | 0.64903  | 0.40685  |
| Q3T0K2 | T-complex protein 1 subunit gamma            | 0.22215  | 0.18039  | 0.0      | 0.056839 | 0.0      | 0.051432 |



|        |                                            |          |          |          |          |          |          |
|--------|--------------------------------------------|----------|----------|----------|----------|----------|----------|
| Q3T0Z0 | WAP four-disulfide core domain 2           | 0.60531  | 26436.0  | 26436.0  | 26436.0  | 26436.0  | 22651.0  |
| Q3T149 | Heat shock protein beta-1                  | 0.74152  | 0.57889  | 0.35592  | 0.16444  | 0.35592  | 0.14877  |
| Q3ZBD7 | Glucose-6-phosphate isomerase              | 13154.0  | 10294.0  | 0.63227  | 0.31286  | 0.46388  | 0.413    |
| Q3ZBH0 | T-complex protein 1 subunit beta           | 0.11787  | 0.13065  | 0.20224  | 0.063319 | 0.0      | 0.057295 |
| Q3ZBM0 | A proliferation-inducing ligand            | 0.11952  | 0.13211  | 0.13211  | 0.28167  | 0.28167  | 0.40313  |
| Q3ZBS7 | Vitronectin                                | 0.42769  | 0.21671  | 0.1397   | 0.21671  | 0.21671  | 0.12602  |
| Q3ZBZ1 | 45 kDa calcium-binding protein             | 4426.0   | 49132.0  | 32151.0  | 1331.0   | 15368.0  | 13294.0  |
| Q3ZC64 | Ephrin-A1                                  | 15927.0  | 1846.0   | 1846.0   | 1451.0   | 1846.0   | 19707.0  |
| Q3ZCH5 | Zinc-alpha-2-glycoprotein                  | 15364.0  | 24165.0  | 1513.0   | 53151.0  | 47005.0  | 26804.0  |
| Q3ZCI9 | T-complex protein 1 subunit theta          | 0.37822  | 0.60222  | 0.4241   | 0.26579  | 0.0      | 0.05492  |
| Q4R0H2 | Spermadhesin 2                             | 39845.0  | 27383.0  | 36571.0  | 26.02    | 32661.0  | 64477.0  |
| Q4W1E4 | Angiotensin-converting enzyme              | 0.53152  | 0.67003  | 0.34872  | 0.53322  | 0.23823  | 0.26176  |
| Q58CQ9 | Pantetheinase                              | 0.64635  | 0.62965  | 0.35694  | 0.35694  | 0.35694  | 0.39427  |
| Q58DP6 | Ribonuclease 4                             | 25748.0  | 23075.0  | 23075.0  | 39279.0  | 12353.0  | 1.98     |
| Q5DPW9 | Cystatin E/M                               | 20867.0  | 32212.0  | 17973.0  | 32212.0  | 41854.0  | 27246.0  |
| Q5E946 | Parkinson disease protein 7 homolog        | 0.16755  | 0.0      | 0.1852   | 0.1852   | 0.66485  | 0.36317  |
| Q5E998 | Cathepsin L2                               | 35925.0  | 54495.0  | 30471.0  | 38764.0  | 2687.0   | 22729.0  |
| Q5E9B1 | L-lactate dehydrogenase B chain            | 0.41023  | 0.099185 | 0.0      | 0.20821  | 0.0      | 0.08974  |
| Q5E9I4 | Alpha-1,3-mannosyl-glycoprotein            | 0.20298  | 0.2258   | 0.07022  | 0.0      | 0.0      | 0.20298  |
| Q5EA54 | Solute carrier family 3                    | 0.67568  | 0.65801  | 0.65801  | 0.76618  | 0.37165  | 0.77461  |
| Q5EA62 | Fibulin-5                                  | 0.3726   | 0.23285  | 0.23285  | 0.23285  | 0.14976  | 0.20928  |
| Q5W5U3 | Hexokinase                                 | 0.031866 | 0.071667 | 0.0      | 0.0      | 0.0      | 0.064748 |
| Q6R8F2 | Cadherin-1                                 | 0.29946  | 0.38416  | 0.24201  | 0.24201  | 0.15545  | 0.2576   |
| Q6T182 | Sex hormone-binding globulin               | 0.24559  | 0.38046  | 0.17493  | 0.083941 | 0.083941 | 0.15767  |
| Q76LV2 | Heat shock protein HSP 90-alpha            | 0.51552  | 0.7193   | 0.51719  | 0.28417  | 0.13321  | 0.12007  |
| Q7SIH1 | Alpha-2-macroglobulin                      | 0.44054  | 0.40398  | 0.26273  | 0.1849   | 0.0      | 0.019397 |
| Q7YRE5 | GDP-fucose protein O-fucosyltransferase 2  | 0.12795  | 0.068576 | 0.068576 | 0.0      | 0.0      | 0.0      |
| Q7YRQ8 | Tissue factor pathway inhibitor 2          | 0.42242  | 0.90652  | 0.67569  | 0.4728   | 11692.0  | 0.79905  |
| Q863C3 | Gastrin-releasing peptide                  | 0.84981  | 14534.0  | 0.9603   | 0.0      | 0.0      | 0.0      |
| Q863K8 | Galactosylgalactosylxylosylprotein         | 0.18574  | 0.32476  | 0.098277 | 0.20621  | 0.32476  | 0.088919 |
| Q8HZY1 | Serine protease inhibitor clade E member 2 | 43308.0  | 39897.0  | 21033.0  | 43184.0  | 36854.0  | 30191.0  |
| Q8SPU5 | BPI fold-containing family A member 1      | 0.60581  | 0.47742  | 0.68269  | 0.29719  | 0.68269  | 0.42649  |
| Q95114 | Lactadherin                                | 0.39354  | 0.24521  | 0.24521  | 0.24521  | 0.24521  | 0.30406  |
| Q95121 | Pigment epithelium-derived factor          | 0.40999  | 0.16341  | 0.078616 | 0.078616 | 0.078616 | 0.14733  |
| Q95M12 | Legumain                                   | 0.47348  | 0.89737  | 0.3293   | 0.42735  | 0.76704  | 0.90798  |
| Q95M18 | Endoplasmin                                | 0.63387  | 0.59071  | 0.26123  | 0.53035  | 0.26123  | 0.47071  |

|        |                                                     |          |          |          |          |          |          |
|--------|-----------------------------------------------------|----------|----------|----------|----------|----------|----------|
| Q9BEG4 | Putative alpha-2,3-sialyltransferase                | 0.91406  | 0.56301  | 0.42945  | 0.42945  | 0.3073   | 0.50045  |
| Q9BGI1 | Peroxiredoxin-5, mitochondrial                      | 0.49579  | 10893.0  | 0.55596  | 0.55596  | 0.55596  | 0.30792  |
| Q9BGI2 | Peroxiredoxin-4                                     | 0.50509  | 0.56763  | 0.40098  | 0.40098  | 0.7541   | 12653.0  |
| Q9BGU5 | Cathepsin D                                         | 51196.0  | 47264.0  | 42698.0  | 34628.0  | 17107.0  | 2608.0   |
| Q9GLE5 | 72 kDa type IV collagenase                          | 0.090458 | 0.10019  | 0.0      | 0.0      | 0.0489   | 0.090458 |
| Q9MYM4 | Lysosomal alpha-glucosidase                         | 0.31758  | 0.22489  | 0.26701  | 0.31058  | 0.069955 | 0.16558  |
| Q9N2I2 | Plasma serine protease inhibitor                    | 56262.0  | 64286.0  | 48941.0  | 64286.0  | 58772.0  | 5178.0   |
| Q9XSC9 | Transcobalamin-2                                    | 13652.0  | 17763.0  | 0.92789  | 19863.0  | 24553.0  | 17001.0  |
| Q9XSJ4 | Alpha-enolase                                       | 0.49602  | 0.67797  | 0.44731  | 0.076743 | 0.44731  | 0.22312  |
| U5Y6U2 | Osteopontin                                         | 46494.0  | 65083.0  | 32888.0  | 32888.0  | 24281.0  | 20661.0  |
| W0UVF3 | Ribonuclease A M1                                   | 18468.0  | 15997.0  | 0.46546  | 15997.0  | 15997.0  | 18468.0  |
| W5NTH3 | Adhesion G protein-coupled receptor G6              | 0.047193 | 0.052211 | 0.052211 | 0.052211 | 0.0      | 0.023324 |
| W5NXW9 | Immunoglobulin heavy constant mu                    | 0.37545  | 0.63497  | 0.15081  | 0.42071  | 0.42071  | 0.21079  |
| W5P198 | Vasoactive intestinal peptide                       | 85112.0  | 24383.0  | 24383.0  | 33074.0  | 19071.0  | 33453.0  |
| W5P1A8 | Proto-oncogene tyrosine-protein kinase receptor Ret | 0.080148 | 0.12012  | 0.028766 | 0.0      | 0.0      | 0.026032 |
| W5Q3V3 | ATPase H <sup>+</sup> transporting V1 subunit E2    | 0.27091  | 0.30133  | 0.0      | 0.0      | 0.14076  | 0.12735  |

**Table S2.** Classification of the SP proteins according to the functional categories of the KOG database. The list presents the identification code of the proteins in the UniProtKB database (UniProtKB ID), the identification code of the proteins in the KOG (KOG ID), the description of the protein in the KOG (KOG Description), the classification of the proteins into KOG groups, and the E-value of the analysis for the classification of the proteins in the different KOG groups.

| UniProtKB ID | KOG ID  | KOG Description                                                                                    | KOG Group                                                                                                                                   | E-value   |
|--------------|---------|----------------------------------------------------------------------------------------------------|---------------------------------------------------------------------------------------------------------------------------------------------|-----------|
| A0A0A0MP92   | KOG2392 | Serpin                                                                                             | Defense mechanisms                                                                                                                          | 6.58E-125 |
| A0A0A7NM57   | ---     | no hits                                                                                            | no hits                                                                                                                                     | ---       |
| A0A0E3UT00   | KOG4745 | Metalloproteinase inhibitor TIMP and related proteins                                              | General function prediction only                                                                                                            | 4.03E-76  |
| A0A0M4B6N2   | ---     | no hits                                                                                            | no hits                                                                                                                                     | ---       |
| A0A4W2DWN4   | ---     | no hits                                                                                            | no hits                                                                                                                                     | ---       |
| A0A6P5C9R4   | ---     | no hits                                                                                            | no hits                                                                                                                                     | ---       |
| A0JN47       | KOG3848 | Extracellular protein TEM7, contains PSI domain (tumor endothelial marker in humans)               | Extracellular structures                                                                                                                    | 0         |
| A0JNP2       | ---     | no hits                                                                                            | no hits                                                                                                                                     | ---       |
| A2I7M9       | KOG2392 | Serpin                                                                                             | Defense mechanisms                                                                                                                          | 4.46E-128 |
| A2I7N1       | KOG2392 | Serpin                                                                                             | Defense mechanisms                                                                                                                          | 9.35E-130 |
| A3KMY8       | KOG2024 | Beta-Glucuronidase GUSB (glycosylhydrolase superfamily 2)                                          | Carbohydrate transport and metabolism                                                                                                       | 1.82E-125 |
| A4IFC0       | ---     | no hits                                                                                            | no hits                                                                                                                                     | ---       |
| A4IFR2       | ---     | no hits                                                                                            | no hits                                                                                                                                     | ---       |
| A5D7U1       | ---     | no hits                                                                                            | no hits                                                                                                                                     | ---       |
| A5D984       | KOG2323 | Pyruvate kinase                                                                                    | Carbohydrate transport and metabolism                                                                                                       | 0         |
| A5PJL8       | ---     | no hits                                                                                            | no hits                                                                                                                                     | ---       |
| A5PKI3       | ---     | no hits                                                                                            | no hits                                                                                                                                     | ---       |
| A6BMK7       | ---     | no hits                                                                                            | no hits                                                                                                                                     | ---       |
| A6QLR7       | KOG3867 | Sulfatase                                                                                          | General function prediction only                                                                                                            | 3.12E-145 |
| A6QLS9       | KOG0078 | GTP-binding protein SEC4, small G protein superfamily, and related Ras family GTP-binding proteins | Signal transduction mechanisms, Intracellular trafficking, secretion, and vesicular transport                                               | 2.34E-124 |
| A6QLZ3       | KOG3867 | Sulfatase                                                                                          | General function prediction only                                                                                                            | 3.23E-161 |
| A6QM01       | KOG2233 | Alpha-N-acetylglucosaminidase                                                                      | Intracellular trafficking, secretion, and vesicular transport                                                                               | 0         |
| A6QNJ8       | KOG1066 | Glucosidase II catalytic (alpha) subunit and related enzymes, glycosyl hydrolase family 31         | Carbohydrate transport and metabolism, Cell wall/membrane/envelope biogenesis, Posttranslational modification, protein turnover, chaperones | 0         |

|        |         |                                                                                                     |                                                                  |           |
|--------|---------|-----------------------------------------------------------------------------------------------------|------------------------------------------------------------------|-----------|
| A6QNL5 | KOG0191 | Thioredoxin/protein disulfide isomerase                                                             | Posttranslational modification, protein turnover, chaperones     | 1.27E-115 |
| A6QNX2 | KOG2183 | Prolylcarboxypeptidase (angiotensinase C)                                                           | Posttranslational modification, protein turnover, chaperones,    | 0         |
| A6QP36 | KOG3839 | Lectin VIP36, involved in the transport of glycoproteins                                            | General function prediction only                                 |           |
| A6QP39 | ---     | carrying high mannose-type glycans                                                                  | Intracellular trafficking, secretion, and vesicular transport    | 3.69E-168 |
| A6QPK0 | ---     | no hits                                                                                             | no hits                                                          | ---       |
| A6QPT4 | KOG2408 | no hits                                                                                             | no hits                                                          | ---       |
| A6QPZ4 | KOG2392 | Peroxidase/oxygenase                                                                                | General function prediction only                                 | 0         |
| A6QQA8 | KOG1731 | Serpin                                                                                              | Defense mechanisms                                               | 7.31E-125 |
| A7E3W2 | KOG4441 | FAD-dependent sulfhydryl oxidase/quiescin and related proteins                                      | Cell cycle control, cell division, chromosome partitioning       | 0         |
| A7MB70 | KOG3611 | Proteins containing BTB/POZ and Kelch domains, involved in regulatory/signal transduction processes | Signal transduction mechanisms, General function prediction only | 5.85E-17  |
| A7MBJ5 | KOG1824 | Semaphorins                                                                                         | Signal transduction mechanisms                                   | 0         |
| A8DC37 | ---     | TATA-binding protein-interacting protein                                                            | General function prediction only                                 | 0         |
| B0JYQ0 | ---     | no hits                                                                                             | no hits                                                          | ---       |
| B5T255 | ---     | no hits                                                                                             | no hits                                                          | ---       |
| B9TUD2 | ---     | no hits                                                                                             | no hits                                                          | ---       |
| D4QBC5 | ---     | no hits                                                                                             | no hits                                                          | ---       |
| D4QBD1 | ---     | no hits                                                                                             | no hits                                                          | ---       |
| E1B6Z6 | ---     | no hits                                                                                             | no hits                                                          | ---       |
| E1B748 | KOG0104 | Molecular chaperones GRP170/SIL1, HSP70 superfamily                                                 | Posttranslational modification, protein turnover, chaperones     | 0         |
| E1B818 | KOG3545 | Olfactomedin and related extracellular matrix glycoproteins                                         | Extracellular structures                                         | 3.40E-134 |
| E1B8A0 | KOG2679 | Purple (tartrate-resistant) acid phosphatase                                                        | Posttranslational modification, protein turnover, chaperones     | 8.80E-147 |
| E1B9P4 | KOG1565 | Gelatinase A and related matrix metalloproteases                                                    | Posttranslational modification, protein turnover, chaperones,    | 3.95E-30  |
| E1BBK6 | KOG1214 | Nidogen and related basement membrane protein proteins                                              | Extracellular structures                                         |           |
| E1BBU4 | KOG3607 | Meltrins, fertilins and related Zn-dependent metalloproteinases of the ADAMs family                 | Cell wall/membrane/envelope biogenesis, Extracellular structures | 2.85E-20  |
| E1BDF3 | KOG1217 | Fibrillins and related proteins containing Ca <sup>2+</sup> -binding EGF-like domains               | Posttranslational modification, protein turnover, chaperones     | 0         |
| E1BDR2 | ---     | no hits                                                                                             | Signal transduction mechanisms                                   | 5.11E-16  |
| E1BDY3 | KOG3648 | Golgi apparatus protein (cysteine-rich fibroblast growth factor receptor)                           | no hits                                                          | ---       |
|        |         |                                                                                                     | Intracellular trafficking, secretion, and vesicular transport    | 0         |

|        |         |                                                                                                                |                                                                                                                                                |               |
|--------|---------|----------------------------------------------------------------------------------------------------------------|------------------------------------------------------------------------------------------------------------------------------------------------|---------------|
| E1BG25 | ---     | no hits                                                                                                        | no hits                                                                                                                                        | ---           |
| E1BH06 | KOG1366 | Alpha-macroglobulin                                                                                            | Posttranslational modification, protein turnover, chaperones                                                                                   | 0             |
| E1BHP0 | KOG1959 | Glycosyl hydrolase, family 38 - alpha-mannosidase                                                              | Carbohydrate transport and metabolism                                                                                                          | 0             |
| E1BI28 | ---     | no hits                                                                                                        | no hits                                                                                                                                        | ---           |
| E1BI74 | ---     | no hits                                                                                                        | no hits                                                                                                                                        | ---           |
| E1BKX1 | ---     | no hits                                                                                                        | no hits                                                                                                                                        | ---           |
| E1BKZ9 | KOG3511 | Sortilin and related receptors                                                                                 | General function prediction only                                                                                                               | 0             |
| E1BLI4 | ---     | no hits                                                                                                        | no hits                                                                                                                                        | ---           |
| E1BMJ0 | KOG2392 | Serpin                                                                                                         | Defense mechanisms                                                                                                                             | 4.56E-70      |
| E1BN79 | KOG4389 | Acetylcholinesterase/Butyrylcholinesterase                                                                     | Signal transduction mechanisms                                                                                                                 | 8.37E-127     |
| E1BNJ9 | KOG3627 | Trypsin                                                                                                        | Amino acid transport and metabolism                                                                                                            | 2.97E-80      |
| E1BQ21 | ---     | no hits                                                                                                        | no hits                                                                                                                                        | ---           |
| F1MCF5 | KOG1651 | Glutathione peroxidase                                                                                         | Posttranslational modification, protein turnover, chaperones                                                                                   | 2.78E-73      |
| F1MD95 | KOG1834 | Calsyntenin                                                                                                    | Extracellular structures                                                                                                                       | 0             |
| F1MDF2 | ---     | no hits                                                                                                        | no hits                                                                                                                                        | ---           |
| F1MGN0 | KOG3611 | Semaphorins                                                                                                    | Signal transduction mechanisms                                                                                                                 | 0             |
| F1MGQ1 | ---     | no hits                                                                                                        | no hits                                                                                                                                        | ---           |
| F1MGU7 | KOG2579 | Ficolin and related extracellular proteins                                                                     | General function prediction only                                                                                                               | 3.15E-105     |
| F1MHF1 | KOG2692 | Sialyltransferase                                                                                              | Carbohydrate transport and metabolism                                                                                                          | 4.55E-34      |
| F1MHR8 | ---     | no hits                                                                                                        | no hits                                                                                                                                        | ---           |
| F1MHS5 | ---     | no hits                                                                                                        | no hits                                                                                                                                        | ---           |
| F1MLR4 | ---     | no hits                                                                                                        | no hits                                                                                                                                        | ---           |
| F1MLW2 | KOG4160 | BPI/LBP/CETP family protein                                                                                    | Defense mechanisms                                                                                                                             | 6.80E-21      |
| F1MLW8 | ---     | no hits                                                                                                        | no hits                                                                                                                                        | ---           |
| F1MNJ4 | ---     | no hits                                                                                                        | no hits                                                                                                                                        | ---           |
| F1MS23 | ---     | no hits                                                                                                        | no hits                                                                                                                                        | ---           |
| F1MTI7 | KOG3338 | Divalent cation tolerance-related protein<br>Puromycin-sensitive aminopeptidase and related<br>aminopeptidases | Inorganic ion transport and metabolism<br>Amino acid transport and metabolism, Posttranslational<br>modification, protein turnover, chaperones | 6.10E-68<br>0 |
| F1MU34 | KOG1046 |                                                                                                                |                                                                                                                                                |               |
| F1MUB9 | KOG3627 | Trypsin                                                                                                        | Amino acid transport and metabolism                                                                                                            | 2.16E-86      |
| F1MUF4 | KOG0496 | Beta-galactosidase                                                                                             | Carbohydrate transport and metabolism                                                                                                          | 0             |

|        |         |                                                                                                 |                                                                  |           |
|--------|---------|-------------------------------------------------------------------------------------------------|------------------------------------------------------------------|-----------|
| F1MWD3 | KOG0357 | Chaperonin complex component, TCP-1 epsilon subunit (CCT5)                                      | Posttranslational modification, protein turnover, chaperones     | 0         |
| F1MWI1 | ---     | no hits                                                                                         | no hits                                                          | ---       |
| F1MWT0 | KOG4342 | Alpha-mannosidase                                                                               | Carbohydrate transport and metabolism                            | 0         |
| F1MX50 | KOG3374 | Cellular repressor of transcription                                                             | Transcription                                                    | 2.50E-101 |
| F1MY12 | KOG4745 | Metalloproteinase inhibitor TIMP and related proteins                                           | General function prediction only                                 | 8.22E-15  |
| F1MYX5 | KOG0046 | Ca <sup>2+</sup> -binding actin-bundling protein (fimbrin/plastin), EF-Hand protein superfamily | Cytoskeleton                                                     | 0         |
| F1MZ40 | KOG1214 | Nidogen and related basement membrane protein proteins                                          | Cell wall/membrane/envelope biogenesis, Extracellular structures | 2.11E-20  |
| F1MZJ5 | KOG3607 | Meltrins, fertilins and related Zn-dependent metalloproteinases of the ADAMs family             | Posttranslational modification, protein turnover, chaperones     | 0         |
| F1N0F2 | ---     | no hits                                                                                         | no hits                                                          | ---       |
| F1N152 | KOG1320 | Serine protease                                                                                 | Posttranslational modification, protein turnover, chaperones     | 2.14E-106 |
| F1N303 | KOG3538 | Disintegrin metalloproteinases with thrombospondin repeats                                      | Posttranslational modification, protein turnover, chaperones     | 0         |
| F1N3U5 | KOG0806 | Carbon-nitrogen hydrolase                                                                       | Amino acid transport and metabolism                              | 9.99E-131 |
| F1N554 | KOG3736 | Polypeptide N-acetylgalactosaminyltransferase                                                   | Posttranslational modification, protein turnover, chaperones     | 0         |
| F1N5H2 | KOG3340 | Alpha-L-fucosidase                                                                              | Carbohydrate transport and metabolism                            | 0         |
| F1N5W4 | KOG2645 | Type I phosphodiesterase/nucleotide pyrophosphatase                                             | General function prediction only                                 | 6.26E-174 |
| F1N7D7 | KOG3781 | Dystroglycan                                                                                    | Extracellular structures                                         | 3.12E-180 |
| F1N7F3 | KOG1025 | Epidermal growth factor receptor EGFR and related tyrosine kinases                              | Signal transduction mechanisms                                   | 0         |
| G1CW25 | ---     | no hits                                                                                         | no hits                                                          | ---       |
| G3MWX7 | ---     | no hits                                                                                         | no hits                                                          | ---       |
| G3MX66 | ---     | no hits                                                                                         | no hits                                                          | ---       |
| G3MZ03 | KOG1928 | Alpha-1,4-N-acetylglucosaminyltransferase                                                       | Carbohydrate transport and metabolism                            | 1.00E-145 |
| G3N0V0 | ---     | no hits                                                                                         | no hits                                                          | ---       |
| G3N2D8 | KOG2410 | Gamma-glutamyltransferase                                                                       | Amino acid transport and metabolism                              | 0         |
| G3X6G7 | ---     | no hits                                                                                         | no hits                                                          | ---       |
| G5E589 | KOG0179 | 20S proteasome, regulatory subunit beta type PSMB1/PRE7                                         | Posttranslational modification, protein turnover, chaperones     | 1.85E-139 |
| G5E5M8 | KOG1959 | Glycosyl hydrolase, family 38 - alpha-mannosidase                                               | Carbohydrate transport and metabolism                            | 0         |
| G5E5T5 | ---     | no hits                                                                                         | no hits                                                          | ---       |
| G5E604 | ---     | no hits                                                                                         | no hits                                                          | ---       |
| H7BWW2 | KOG2499 | Beta-N-acetylhexosaminidase                                                                     | Carbohydrate transport and metabolism                            | 0         |

|        |         |                                                                               |                                                                       |           |
|--------|---------|-------------------------------------------------------------------------------|-----------------------------------------------------------------------|-----------|
| L8HKR7 | ---     | no hits                                                                       | no hits                                                               | ---       |
| L8HP94 | ---     | no hits                                                                       | no hits                                                               | ---       |
| L8HPF5 | ---     | no hits                                                                       | no hits                                                               | ---       |
| L8HZ66 | KOG1367 | 3-phosphoglycerate kinase                                                     | Carbohydrate transport and metabolism                                 | 0         |
| L8HZP9 | KOG3690 | Angiotensin I-converting enzymes - M2 family peptidases                       | Amino acid transport and metabolism                                   | 0         |
| L8I064 | KOG3867 | Sulfatase                                                                     | General function prediction only                                      | 1.57E-129 |
| L8I2G8 | KOG2392 | Serpin                                                                        | Defense mechanisms                                                    | 1.15E-46  |
| L8IAF4 | ---     | no hits                                                                       | no hits                                                               | ---       |
| L8IAH9 | KOG1731 | FAD-dependent sulfhydryl oxidase/quiescin and related proteins                | Cell cycle control, cell division, chromosome partitioning            | 8.78E-166 |
| L8IC40 | ---     | no hits                                                                       | no hits                                                               | ---       |
| L8ICQ2 | KOG4419 | 5' nucleotidase                                                               | Nucleotide transport and metabolism                                   | 0         |
| L8IEA1 | KOG2499 | Beta-N-acetylhexosaminidase                                                   | Carbohydrate transport and metabolism                                 | 0         |
| L8IHR1 | KOG1219 | Uncharacterized conserved protein, contains laminin, cadherin and EGF domains | Signal transduction mechanisms                                        | 0         |
| L8IQM7 | KOG1219 | Uncharacterized conserved protein, contains laminin, cadherin and EGF domains | Signal transduction mechanisms                                        | 6.49E-14  |
| L8IVU7 | KOG0358 | Chaperonin complex component, TCP-1 delta subunit (CCT4)                      | Posttranslational modification, protein turnover, chaperones          | 0         |
| L8IXW5 | KOG1340 | Prosaposin                                                                    | Lipid transport and metabolism, Carbohydrate transport and metabolism | 8.39E-59  |
| L8J2B5 | KOG3540 | Beta amyloid precursor protein                                                | General function prediction only                                      | 0         |
| L8J3B9 | KOG4237 | Extracellular matrix protein slit, contains leucine-rich and EGF-like repeats | Extracellular structures, Signal transduction mechanisms              | 0         |
| L8J3G6 | KOG0819 | Annexin                                                                       | Intracellular trafficking, secretion, and vesicular transport         | 4.19E-162 |
| M5FKI8 | ---     | no hits                                                                       | no hits                                                               | ---       |
| O46375 | KOG3006 | Transthyretin and related proteins                                            | Lipid transport and metabolism                                        | 7.91E-59  |
| O77588 | KOG1971 | Lysyl hydroxylase                                                             | Posttranslational modification, protein turnover, chaperones          | 0         |
| P00517 | KOG0616 | cAMP-dependent protein kinase catalytic subunit (PKA)                         | Signal transduction mechanisms                                        | 0         |
| P00570 | KOG3079 | Uridylate kinase/adenylate kinase                                             | Nucleotide transport and metabolism                                   | 2.58E-104 |
| P00669 | ---     | no hits                                                                       | no hits                                                               | ---       |
| P01045 | ---     | no hits                                                                       | no hits                                                               | ---       |
| P01888 | ---     | no hits                                                                       | no hits                                                               | ---       |
| P01966 | ---     | no hits                                                                       | no hits                                                               | ---       |

|        |         |                                                                               |                                                              |           |
|--------|---------|-------------------------------------------------------------------------------|--------------------------------------------------------------|-----------|
| P02584 | KOG1755 | Profilin                                                                      | Cytoskeleton                                                 | 1.60E-49  |
| P02672 | ---     | no hits                                                                       | no hits                                                      | ---       |
| P02676 | KOG2579 | Ficolin and related extracellular proteins                                    | General function prediction only                             | 2.94E-114 |
| P02769 | ---     | no hits                                                                       | no hits                                                      | ---       |
| P02784 | ---     | no hits                                                                       | no hits                                                      | ---       |
| P04557 | ---     | no hits                                                                       | no hits                                                      | ---       |
| P05307 | KOG0190 | Protein disulfide isomerase (prolyl 4-hydroxylase beta subunit)               | Posttranslational modification, protein turnover, chaperones | 0         |
| P07456 | ---     | no hits                                                                       | no hits                                                      | ---       |
| P07688 | KOG1543 | Cysteine proteinase Cathepsin L                                               | Posttranslational modification, protein turnover, chaperones | 4.93E-72  |
| P08037 | KOG3916 | UDP-Gal:glucosylceramide beta-1,4-galactosyltransferase                       | Carbohydrate transport and metabolism                        | 0         |
| P0C0S9 | KOG1756 | Histone 2A                                                                    | Chromatin structure and dynamics                             | 3.55E-73  |
| P10096 | KOG0657 | Glyceraldehyde 3-phosphate dehydrogenase                                      | Carbohydrate transport and metabolism                        | 1.40E-180 |
| P10152 | ---     | no hits                                                                       | no hits                                                      | ---       |
| P12763 | ---     | no hits                                                                       | no hits                                                      | ---       |
| P13600 | ---     | no hits                                                                       | no hits                                                      | ---       |
| P13696 | KOG3346 | Phosphatidylethanolamine binding protein                                      | General function prediction only                             | 2.23E-91  |
| P14769 | ---     | no hits                                                                       | no hits                                                      | ---       |
| P15497 | ---     | no hits                                                                       | no hits                                                      | ---       |
| P16116 | KOG1577 | Aldo/keto reductase family proteins                                           | General function prediction only                             | 4.51E-154 |
| P17697 | ---     | no hits                                                                       | no hits                                                      | ---       |
| P19120 | KOG0101 | Molecular chaperones HSP70/HSC70, HSP70 superfamily                           | Posttranslational modification, protein turnover, chaperones | 0         |
| P19879 | KOG4237 | Extracellular matrix protein slit, contains leucine-rich and EGF-like repeats | Extracellular structures, Signal transduction mechanisms     | 1.74E-13  |
| P22226 | ---     | no hits                                                                       | no hits                                                      | ---       |
| P25326 | KOG1543 | Cysteine proteinase Cathepsin L                                               | Posttranslational modification, protein turnover, chaperones | 4.66E-111 |
| P28291 | ---     | no hits                                                                       | no hits                                                      | ---       |
| P29392 | ---     | no hits                                                                       | no hits                                                      | ---       |
| P31096 | ---     | no hits                                                                       | no hits                                                      | ---       |
| P31976 | KOG3529 | Radixin, moesin and related proteins of the ERM family                        | General function prediction only                             | 0         |
| P34955 | KOG2392 | Serpin                                                                        | Defense mechanisms                                           | 3.15E-126 |
| P37141 | KOG1651 | Glutathione peroxidase                                                        | Posttranslational modification, protein turnover, chaperones | 2.12E-74  |



|        |         |                                                                                                                                                     |                                                                                               |           |
|--------|---------|-----------------------------------------------------------------------------------------------------------------------------------------------------|-----------------------------------------------------------------------------------------------|-----------|
| P38657 | KOG0190 | Protein disulfide isomerase (prolyl 4-hydroxylase beta subunit)                                                                                     | Posttranslational modification, protein turnover, chaperones                                  | 0         |
| P40682 | KOG3868 | Vacuolar H <sup>+</sup> -ATPase V0 sector, accessory subunit S1 (Ac45)                                                                              | Energy production and conversion                                                              | 1.95E-158 |
| P45478 | KOG2541 | Palmitoyl protein thioesterase                                                                                                                      | Lipid transport and metabolism, Posttranslational modification, protein turnover, chaperones  | 2.67E-139 |
| P52193 | KOG0674 | Calreticulin                                                                                                                                        | Posttranslational modification, protein turnover, chaperones                                  | 0         |
| P55206 | ---     | no hits                                                                                                                                             | no hits                                                                                       | ---       |
| P62803 | KOG3467 | Histone H4                                                                                                                                          | Chromatin structure and dynamics                                                              | 8.36E-56  |
| P62935 | KOG0865 | Cyclophilin type peptidyl-prolyl cis-trans isomerase                                                                                                | Posttranslational modification, protein turnover, chaperones                                  | 7.79E-126 |
| P62992 | KOG0004 | Ubiquitin/40S ribosomal protein S27a fusion                                                                                                         | Translation, ribosomal structure and biogenesis                                               | 2.73E-90  |
| P63103 | KOG0841 | Multifunctional chaperone (14-3-3 family)                                                                                                           | Posttranslational modification, protein turnover, chaperones                                  | 1.77E-141 |
| P63258 | KOG0676 | Actin and related proteins                                                                                                                          | Cytoskeleton                                                                                  | 0         |
| P68103 | KOG0052 | Translation elongation factor EF-1 alpha/Tu                                                                                                         | Translation, ribosomal structure and biogenesis                                               | 0         |
| P79345 | KOG4063 | Major epididymal secretory protein HE1                                                                                                              | Function unknown                                                                              | 8.96E-61  |
| P80025 | KOG2408 | Peroxidase/oxygenase                                                                                                                                | General function prediction only                                                              | 0         |
| P80311 | KOG0880 | Peptidyl-prolyl cis-trans isomerase                                                                                                                 | Posttranslational modification, protein turnover, chaperones                                  | 9.99E-128 |
| P81019 | ---     | no hits                                                                                                                                             | no hits                                                                                       | ---       |
| P81134 | KOG4737 | ATPase membrane sector associated protein                                                                                                           | Energy production and conversion                                                              | 1.15E-168 |
| P81187 | KOG3627 | Trypsin                                                                                                                                             | Amino acid transport and metabolism                                                           | 4.09E-34  |
| P81265 | ---     | no hits                                                                                                                                             | no hits                                                                                       | ---       |
| P81425 | KOG2100 | Dipeptidyl aminopeptidase                                                                                                                           | Posttranslational modification, protein turnover, chaperones                                  | 0         |
| P81947 | KOG1376 | Alpha tubulin                                                                                                                                       | Cytoskeleton                                                                                  | 0         |
| P82292 | ---     | no hits                                                                                                                                             | no hits                                                                                       | ---       |
| Q08DW4 | KOG3627 | Trypsin                                                                                                                                             | Amino acid transport and metabolism                                                           | 1.02E-65  |
| Q08E54 | KOG3540 | Beta amyloid precursor protein                                                                                                                      | General function prediction only                                                              | 0         |
| Q0IIH5 | KOG3866 | DNA-binding protein of the nucleobindin family                                                                                                      | General function prediction only                                                              | 0         |
| Q0P569 | KOG3866 | DNA-binding protein of the nucleobindin family                                                                                                      | General function prediction only                                                              | 0         |
| Q0V8B6 | ---     | no hits                                                                                                                                             | no hits                                                                                       | ---       |
| Q0V8R6 | KOG2499 | Beta-N-acetylhexosaminidase                                                                                                                         | Carbohydrate transport and metabolism                                                         | 0         |
| Q0VCQ9 | KOG4223 | Reticulocalbin, calumenin, DNA supercoiling factor, and related Ca <sup>2+</sup> -binding proteins of the CREC family (EF-Hand protein superfamily) | Signal transduction mechanisms, Intracellular trafficking, secretion, and vesicular transport | 5.78E-117 |
| Q0VCX2 | KOG0100 | Molecular chaperones GRP78/BiP/KAR2, HSP70 superfamily                                                                                              | Posttranslational modification, protein turnover, chaperones                                  | 0         |

|        |         |                                                                                          |                                                                                                                                        |           |
|--------|---------|------------------------------------------------------------------------------------------|----------------------------------------------------------------------------------------------------------------------------------------|-----------|
| Q0VD19 | KOG3770 | Acid sphingomyelinase and PHM5 phosphate metabolism protein                              | Lipid transport and metabolism                                                                                                         | 0         |
| Q148N3 | KOG1565 | Gelatinase A and related matrix metalloproteases                                         | Posttranslational modification, protein turnover, chaperones, Extracellular structures                                                 | 5.01E-92  |
| Q17QB3 | ---     | no hits                                                                                  | no hits                                                                                                                                | ---       |
| Q17QC7 | ---     | no hits                                                                                  | no hits                                                                                                                                | ---       |
| Q17QK3 | KOG2195 | Transferrin receptor and related proteins containing the protease-associated (PA) domain | Posttranslational modification, protein turnover, chaperones, Inorganic ion transport and metabolism, General function prediction only | 1.24E-105 |
| Q17QR9 | KOG3555 | Ca <sup>2+</sup> -binding proteoglycan Testican                                          | General function prediction only                                                                                                       | 0         |
| Q1JPB0 | KOG2392 | Serpin                                                                                   | Defense mechanisms                                                                                                                     | 4.12E-143 |
| Q1LZH9 | KOG3731 | Sulfatases                                                                               | Carbohydrate transport and metabolism                                                                                                  | 0         |
| Q1RMN0 | KOG1593 | Asparaginase                                                                             | Amino acid transport and metabolism                                                                                                    | 4.02E-152 |
| Q1RMN8 | ---     | no hits                                                                                  | no hits                                                                                                                                | ---       |
| Q1ZYR0 | ---     | no hits                                                                                  | no hits                                                                                                                                | ---       |
| Q28017 | KOG3847 | Phospholipase A2 (platelet-activating factor acetylhydrolase in humans)                  | Lipid transport and metabolism                                                                                                         | 0         |
| Q28085 | ---     | no hits                                                                                  | no hits                                                                                                                                | ---       |
| Q29443 | ---     | no hits                                                                                  | no hits                                                                                                                                | ---       |
| Q29444 | KOG2230 | Predicted beta-mannosidase                                                               | Carbohydrate transport and metabolism                                                                                                  | 0         |
| Q29451 | KOG1959 | Glycosyl hydrolase, family 38 - alpha-mannosidase                                        | Carbohydrate transport and metabolism                                                                                                  | 0         |
| Q2HJF0 | ---     | no hits                                                                                  | no hits                                                                                                                                | ---       |
| Q2KHZ8 | KOG2566 | Beta-glucocerebrosidase                                                                  | Carbohydrate transport and metabolism                                                                                                  | 0         |
| Q2KIF2 | KOG4194 | Membrane glycoprotein LIG-1                                                              | Signal transduction mechanisms                                                                                                         | 6.01E-32  |
| Q2KIM0 | KOG3340 | Alpha-L-fucosidase                                                                       | Carbohydrate transport and metabolism                                                                                                  | 0         |
| Q2KIY5 | KOG3774 | Uncharacterized conserved protein Lama                                                   | Signal transduction mechanisms                                                                                                         | 0         |
| Q2KJF1 | ---     | no hits                                                                                  | no hits                                                                                                                                | ---       |
| Q2LGB2 | ---     | no hits                                                                                  | no hits                                                                                                                                | ---       |
| Q2NKZ9 | KOG1283 | Serine carboxypeptidases                                                                 | Posttranslational modification, protein turnover, chaperones                                                                           | 0         |
| Q2NL29 | KOG0693 | Myo-inositol-1-phosphate synthase                                                        | Lipid transport and metabolism                                                                                                         | 0         |
| Q2T9S4 | KOG2882 | p-Nitrophenyl phosphatase                                                                | Inorganic ion transport and metabolism                                                                                                 | 1.76E-135 |
| Q2TBU0 | KOG3627 | Trypsin                                                                                  | Amino acid transport and metabolism                                                                                                    | 2.77E-48  |
| Q2TBX4 | KOG0101 | Molecular chaperones HSP70/HSC70, HSP70 superfamily                                      | Posttranslational modification, protein turnover, chaperones                                                                           | 4.28E-133 |

|        |         |                                                                                                       |                                                                                                   |           |
|--------|---------|-------------------------------------------------------------------------------------------------------|---------------------------------------------------------------------------------------------------|-----------|
| Q2UVX4 | KOG1366 | Alpha-macroglobulin                                                                                   | Posttranslational modification, protein turnover, chaperones                                      | 0         |
| Q32KV0 | KOG0235 | Phosphoglycerate mutase                                                                               | Carbohydrate transport and metabolism                                                             | 5.84E-108 |
| Q32L40 | KOG0360 | Chaperonin complex component, TCP-1 alpha subunit (CCT1)                                              | Posttranslational modification, protein turnover, chaperones                                      | 0         |
| Q32L48 | KOG1744 | Histone H2B                                                                                           | Chromatin structure and dynamics                                                                  | 5.22E-58  |
| Q32LF7 | KOG3916 | UDP-Gal:glucosylceramide beta-1,4-galactosyltransferase                                               | Carbohydrate transport and metabolism                                                             | 4.68E-151 |
| Q32LQ0 | KOG1046 | Puromycin-sensitive aminopeptidase and related aminopeptidases                                        | Amino acid transport and metabolism, Posttranslational modification, protein turnover, chaperones | 0         |
| Q3B7N2 | KOG0035 | Ca <sup>2+</sup> -binding actin-bundling protein (actinin), alpha chain (EF-Hand protein superfamily) | Cytoskeleton                                                                                      | 0         |
| Q3MHM5 | KOG1375 | Beta tubulin                                                                                          | Cytoskeleton                                                                                      | 0         |
| Q3MHN5 | ---     | no hits                                                                                               | no hits                                                                                           | ---       |
| Q3MHX6 | KOG3394 | Protein OS-9                                                                                          | General function prediction only                                                                  | 7.35E-151 |
| Q3MI05 | KOG1282 | Serine carboxypeptidases (lysosomal cathepsin A)                                                      | Amino acid transport and metabolism, Posttranslational modification, protein turnover, chaperones | 0         |
| Q3SX14 | KOG0443 | Actin regulatory proteins (gelsolin/villin family)                                                    | Cytoskeleton                                                                                      | 0         |
| Q3SX46 | KOG2246 | Galactosyltransferases                                                                                | Carbohydrate transport and metabolism                                                             | 1.38E-98  |
| Q3SYR8 | ---     | no hits                                                                                               | no hits                                                                                           | ---       |
| Q3SYW2 | KOG3627 | Trypsin                                                                                               | Amino acid transport and metabolism                                                               | 1.54E-30  |
| Q3SZB7 | KOG1458 | Fructose-1,6-bisphosphatase                                                                           | Carbohydrate transport and metabolism                                                             | 0         |
| Q3SZV7 | KOG1565 | Gelatinase A and related matrix metalloproteases                                                      | Posttranslational modification, protein turnover, chaperones, Extracellular structures            | 6.92E-56  |
| Q3T010 | KOG3346 | Phosphatidylethanolamine binding protein                                                              | General function prediction only                                                                  | 3.25E-57  |
| Q3T052 | KOG2353 | L-type voltage-dependent Ca <sup>2+</sup> channel, alpha2/delta subunit                               | Inorganic ion transport and metabolism, Signal transduction mechanisms                            | 1.48E-12  |
| Q3T0A3 | KOG3627 | Trypsin                                                                                               | Amino acid transport and metabolism                                                               | 4.29E-71  |
| Q3T0K2 | KOG0364 | Chaperonin complex component, TCP-1 gamma subunit (CCT3)                                              | Posttranslational modification, protein turnover, chaperones                                      | 0         |
| Q3T0Z0 | KOG4802 | Adhesion-type protein                                                                                 | Extracellular structures                                                                          | 9.13E-11  |
| Q3T149 | KOG3591 | Alpha crystallins                                                                                     | Posttranslational modification, protein turnover, chaperones                                      | 3.30E-63  |
| Q3ZBD7 | KOG2446 | Glucose-6-phosphate isomerase                                                                         | Carbohydrate transport and metabolism                                                             | 0         |
| Q3ZBH0 | KOG0363 | Chaperonin complex component, TCP-1 beta subunit (CCT2)                                               | Posttranslational modification, protein turnover, chaperones                                      | 0         |
| Q3ZBM0 | ---     | no hits                                                                                               | no hits                                                                                           | ---       |
| Q3ZBS7 | KOG1565 | Gelatinase A and related matrix metalloproteases                                                      | Posttranslational modification, protein turnover, chaperones, Extracellular structures            | 6.82E-42  |

|        |         |                                                                                   |                                                                  |           |
|--------|---------|-----------------------------------------------------------------------------------|------------------------------------------------------------------|-----------|
| Q3ZBZ1 | KOG4251 | Calcium binding protein                                                           | General function prediction only                                 | 0         |
| Q3ZC64 | KOG3858 | Ephrin, ligand for Eph receptor tyrosine kinase                                   | Signal transduction mechanisms                                   | 4.38E-62  |
| Q3ZCH5 | ---     | no hits                                                                           | no hits                                                          | ---       |
| Q3ZCI9 | KOG0362 | Chaperonin complex component, TCP-1 theta subunit (CCT8)                          | Posttranslational modification, protein turnover, chaperones     | 0         |
| Q4R0H2 | ---     | no hits                                                                           | no hits                                                          | ---       |
| Q4W1E4 | KOG3690 | Angiotensin I-converting enzymes - M2 family peptidases                           | Amino acid transport and metabolism                              | 0         |
| Q58CQ9 | KOG0806 | Carbon-nitrogen hydrolase                                                         | Amino acid transport and metabolism                              | 1.19E-130 |
| Q58DP6 | ---     | no hits                                                                           | no hits                                                          | ---       |
| Q5DPW9 | ---     | no hits                                                                           | no hits                                                          | ---       |
| Q5E946 | KOG2764 | Putative transcriptional regulator DJ-1                                           | General function prediction only, Defense mechanisms             | 2.57E-83  |
| Q5E998 | KOG1543 | Cysteine proteinase Cathepsin L                                                   | Posttranslational modification, protein turnover, chaperones     | 1.64E-117 |
| Q5E9B1 | KOG1495 | Lactate dehydrogenase                                                             | Energy production and conversion                                 | 0         |
| Q5E9I4 | KOG1413 | N-acetylglucosaminyltransferase I                                                 | Carbohydrate transport and metabolism                            | 0         |
| Q5EA54 | KOG0471 | Alpha-amylase                                                                     | Carbohydrate transport and metabolism                            | 3.58E-76  |
| Q5EA62 | KOG1214 | Nidogen and related basement membrane protein proteins                            | Cell wall/membrane/envelope biogenesis, Extracellular structures | 1.86E-20  |
| Q5W5U3 | KOG1369 | Hexokinase                                                                        | Carbohydrate transport and metabolism                            | 0         |
| Q6R8F2 | KOG4289 | Cadherin EGF LAG seven-pass G-type receptor                                       | Signal transduction mechanisms                                   | 9.65E-45  |
| Q6T182 | ---     | no hits                                                                           | no hits                                                          | ---       |
| Q76LV2 | KOG0019 | Molecular chaperone (HSP90 family)                                                | Posttranslational modification, protein turnover, chaperones     | 0         |
| Q7SIH1 | KOG1366 | Alpha-macroglobulin                                                               | Posttranslational modification, protein turnover, chaperones     | 0         |
| Q7YRE5 | ---     | no hits                                                                           | no hits                                                          | ---       |
| Q7YRQ8 | KOG4295 | Serine proteinase inhibitor (KU family)                                           | Posttranslational modification, protein turnover, chaperones     | 9.96E-17  |
| Q863C3 | ---     | no hits                                                                           | no hits                                                          | ---       |
| Q863K8 | KOG1476 | Beta-1,3-glucuronyltransferase B3GAT1/SQV-8                                       | Posttranslational modification, protein turnover, chaperones     | 2.52E-133 |
| Q8HZY1 | KOG2392 | Serpin                                                                            | Defense mechanisms                                               | 1.59E-116 |
| Q8SPU5 | ---     | no hits                                                                           | no hits                                                          | ---       |
| Q95114 | KOG1094 | Discoidin domain receptor DDR1                                                    | Signal transduction mechanisms                                   | 4.77E-25  |
| Q95121 | KOG2392 | Serpin                                                                            | Defense mechanisms                                               | 1.42E-85  |
| Q95M12 | KOG1348 | Asparaginyl peptidases                                                            | Posttranslational modification, protein turnover, chaperones     | 0         |
| Q95M18 | KOG0020 | Endoplasmic reticulum glucose-regulated protein (GRP94/endoplasmin), HSP90 family | Posttranslational modification, protein turnover, chaperones     | 0         |

|        |         |                                                                                          |                                                                                        |           |
|--------|---------|------------------------------------------------------------------------------------------|----------------------------------------------------------------------------------------|-----------|
| Q9BEG4 | KOG2692 | Sialyltransferase                                                                        | Carbohydrate transport and metabolism                                                  | 1.70E-99  |
| Q9BGI1 | KOG0541 | Alkyl hydroperoxide reductase/pxoxiredoxin                                               | Posttranslational modification, protein turnover, chaperones                           | 1.09E-73  |
| Q9BGI2 | KOG0852 | Alkyl hydroperoxide reductase, thiol specific antioxidant and related enzymes            | Posttranslational modification, protein turnover, chaperones                           | 1.02E-130 |
| Q9BGU5 | KOG1339 | Aspartyl protease                                                                        | Posttranslational modification, protein turnover, chaperones                           | 3.29E-97  |
| Q9GLE5 | KOG1565 | Gelatinase A and related matrix metalloproteases                                         | Posttranslational modification, protein turnover, chaperones, Extracellular structures | 7.45E-145 |
| Q9MYM4 | KOG1065 | Maltase glucoamylase and related hydrolases, glycosyl hydrolase family 31                | Carbohydrate transport and metabolism                                                  | 0         |
| Q9N2I2 | KOG2392 | Serpin                                                                                   | Defense mechanisms                                                                     | 3.61E-123 |
| Q9XSC9 | ---     | no hits                                                                                  | no hits                                                                                | ---       |
| Q9XSJ4 | KOG2670 | Enolase                                                                                  | Carbohydrate transport and metabolism                                                  | 0         |
| U5Y6U2 | ---     | no hits                                                                                  | no hits                                                                                | ---       |
| W0UVF3 | ---     | no hits                                                                                  | no hits                                                                                | ---       |
| W5NTH3 | KOG4193 | G protein-coupled receptors                                                              | Signal transduction mechanisms                                                         | 3.91E-128 |
| W5NXW9 | ---     | no hits                                                                                  | no hits                                                                                | ---       |
| W5P198 | ---     | no hits                                                                                  | no hits                                                                                | ---       |
| W5P1A8 | KOG0200 | Fibroblast/platelet-derived growth factor receptor and related receptor tyrosine kinases | Signal transduction mechanisms                                                         | 2.56E-145 |
| W5Q3V3 | ---     | no hits                                                                                  | no hits                                                                                | ---       |
